# Supplementary material
Source: bioRxiv or medRxiv preprint supplement (https://www.biorxiv.org/highwire/filestream/108602/field_highwire_adjunct_files/31/178806-38.pdf)
Supplement: Supplementary file [file 178806-38.pdf]

**Supplementary Table 13:** Sample sizes and DOIs for studies of the 9 traits considered in the coheritability analysis.

| Trait                                    | Sample Size | DOI                                                                                                                                                                                                                                          |
|------------------------------------------|-------------|----------------------------------------------------------------------------------------------------------------------------------------------------------------------------------------------------------------------------------------------|
| Attention deficit hyperactivity disorder | 55,374      | DOI:10.1101/145581. Discovery of the first genome-wide significant risk loci for ADHD. 2017. Biorxiv preprint 2017/06/03/145581.                                                                                                             |
| Alzheimer's disease                      | 54,162      | DOI:10.1038/ng.2802. Meta-analysis of 74,046 {Jones:2016do}individuals identifies 11 new susceptibility loci for Alzheimer's disease. 2013. Nature Genetics. 45(12) p1452-8.                                                                 |
| Autism spectrum                          | 13,574      | DOI:10.1186/s13229-017-0137-9. Meta-analysis of GWAS of over 16,000 individuals with autism spectrum disorder highlights a novel locus at 10q24.32 and a significant overlap with schizophrenia. 2017. Brain, Cognition and Behavior. 8(21). |
| Major depressive disorder                | 18,759      | DOI:10.1038/mp.2012.21. A mega-analysis of genome-wide association studies for major depressive disorder. 2013. Molecular Psychiatry. 18(4) p497-511.                                                                                        |
| Schizophrenia                            | 70,100      | DOI:10.1038/nature13595. Biological insights from 108 schizophrenia-associated genetic loci. 2014. 511(7510) p421-7.                                                                                                                         |
| Stroke                                   | 29,633      | DOI:10.1212/WNL.0000000000002528. Low-frequency and common genetic variation in ischemic stroke: The METASTROKE collaboration. 2016. Neurology 86(13) p1217-26.                                                                              |
| Amyotrophic lateral sclerosis            | 36,052      | DOI: 10.1038/ng.3622. Genome-wide association analyses identify new risk variants and the genetic architecture of amyotrophic lateral sclerosis. 2016. Nature Genetics. 48(9) 1043-8.                                                        |
| Neuroticism                              | 170,911     | DOI:10.1038/ng.3552. Genetic variants associated with subjective well-being, depressive symptoms, and neuroticism identified through genome-wide analyses. 2016. Nature. 48(6) p624-33.                                                      |
| Sleep duration                           | 127,573     | DOI:10.1371/journal.pgen.1006125. Genome-wide association analyses in 128,266 individuals identifies new morningness and sleep duration loci. 2016. PLOS Genetics. 12(8).                                                                    |
| Bipolar disorder                         | 16,731      | DOI: 10.1038/ng.943. Large-scale genome-wide association analysis of bipolar disorder identifies a new susceptibility locus near ODZ4. 2011. Nature Genetics 43(977).                                                                        |
